# Supplementary material
Source: MDPI journal article supplement (https://www.mdpi.com/2624-8611/4/2/17)
Supplement: s1 [file s1]

**Table S1.** Significance of Pearson's correlation between sex- and age- adjusted proportional hospitalization ratio (PHR) of mental disorders and Psychiatrists per 10,000 inhabitants.

|                                                          | <b>Psychiatrists/10,000 inhabitants</b> |
|----------------------------------------------------------|-----------------------------------------|
| <b>Mental disorders</b>                                  | 0.084                                   |
| <b>Diseases of the nervous system</b>                    | 0.143                                   |
| <b>Senile and presenile organic psychotic conditions</b> | 0.502                                   |
| <b>Schizophrenic and other psychoses</b>                 | 0.799                                   |
| <b>Affective psychoses</b>                               | 0.206                                   |
| <b>Alcohol dependence syndrome</b>                       | 0.234                                   |
| <b>Drug dependence</b>                                   | 0.067                                   |
