# Supplementary material
Source: MDPI journal article supplement (https://www.mdpi.com/2624-8611/4/2/17)
Supplement: s1 [file s1]

Archive with 1 entries (1 files):
- psych-1575870-supplementary.pdf
